# Supplementary material for: MOF-derived nitrogen-doped core–shell hierarchical porous carbon confining selenium for advanced lithium–selenium batteries
Source: Royal Society of Chemistry journal article supplement (doi:10.1039/c9nr00924h), 2019-01-01
Supplement: c9nr00924h1.pdf [file c9nr00924h1.pdf]

## Supporting Information

### **MOF-Derived Nitrogen-Doped Core-Shell Hierarchical Porous Carbon Confining Selenium for Advanced Lithium-Selenium Battery**

Jian-Ping Song<sup>a</sup>, Liang Wu<sup>a</sup>, Wen-Da Dong<sup>a</sup>, Chao-Fan Li<sup>a, b</sup>, Li-Hua Chen<sup>a\*</sup>, Xin Dai<sup>a</sup>, Chao Li<sup>c</sup>,  
Hao Chen<sup>a</sup>, Wei Zhou<sup>a</sup>, Wen-Bei Yu<sup>a</sup>, Zhi-Yi Hu<sup>a, b</sup>, Jing Liu<sup>a</sup>, Hong-En Wang<sup>a</sup>, Yu Li<sup>a, b\*</sup>, Bao-Lian  
Su<sup>a, c</sup>

<sup>a</sup> State Key Laboratory of Advanced Technology for Materials Synthesis and Processing, Wuhan University of  
Technology, 122 Luoshi Road, 430070 Wuhan, Hubei, China.

<sup>b</sup> Nanostructure Research Centre (NRC), Wuhan University of Technology, 122 Luoshi Road, 430070 Wuhan,  
Hubei, China.

<sup>c</sup> Laboratory of Inorganic Materials Chemistry (CMI), University of Namur, 61 rue de Bruxelles, B-5000 Namur,  
Belgium.

\*To whom correspondence should be addressed. Email: [chenlihua@whut.edu.cn](mailto:chenlihua@whut.edu.cn) and [yu.li@whut.edu.cn](mailto:yu.li@whut.edu.cn)

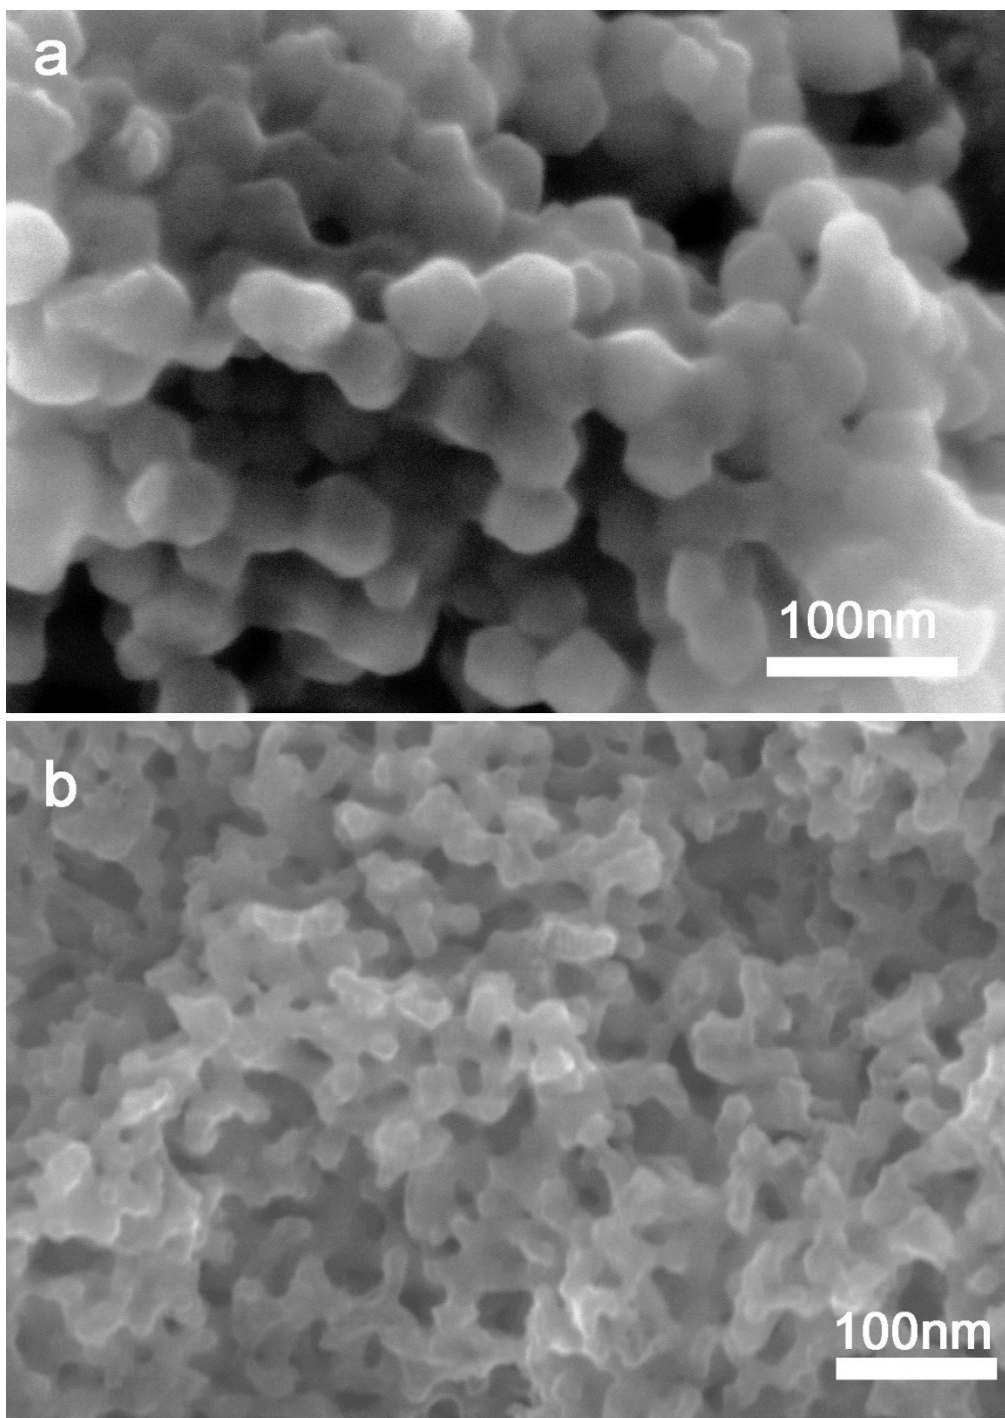

**Fig. S1.** SEM images of (a) the ZIF-8 nanoparticles and (b) C-ZIF-8 nanoparticles.

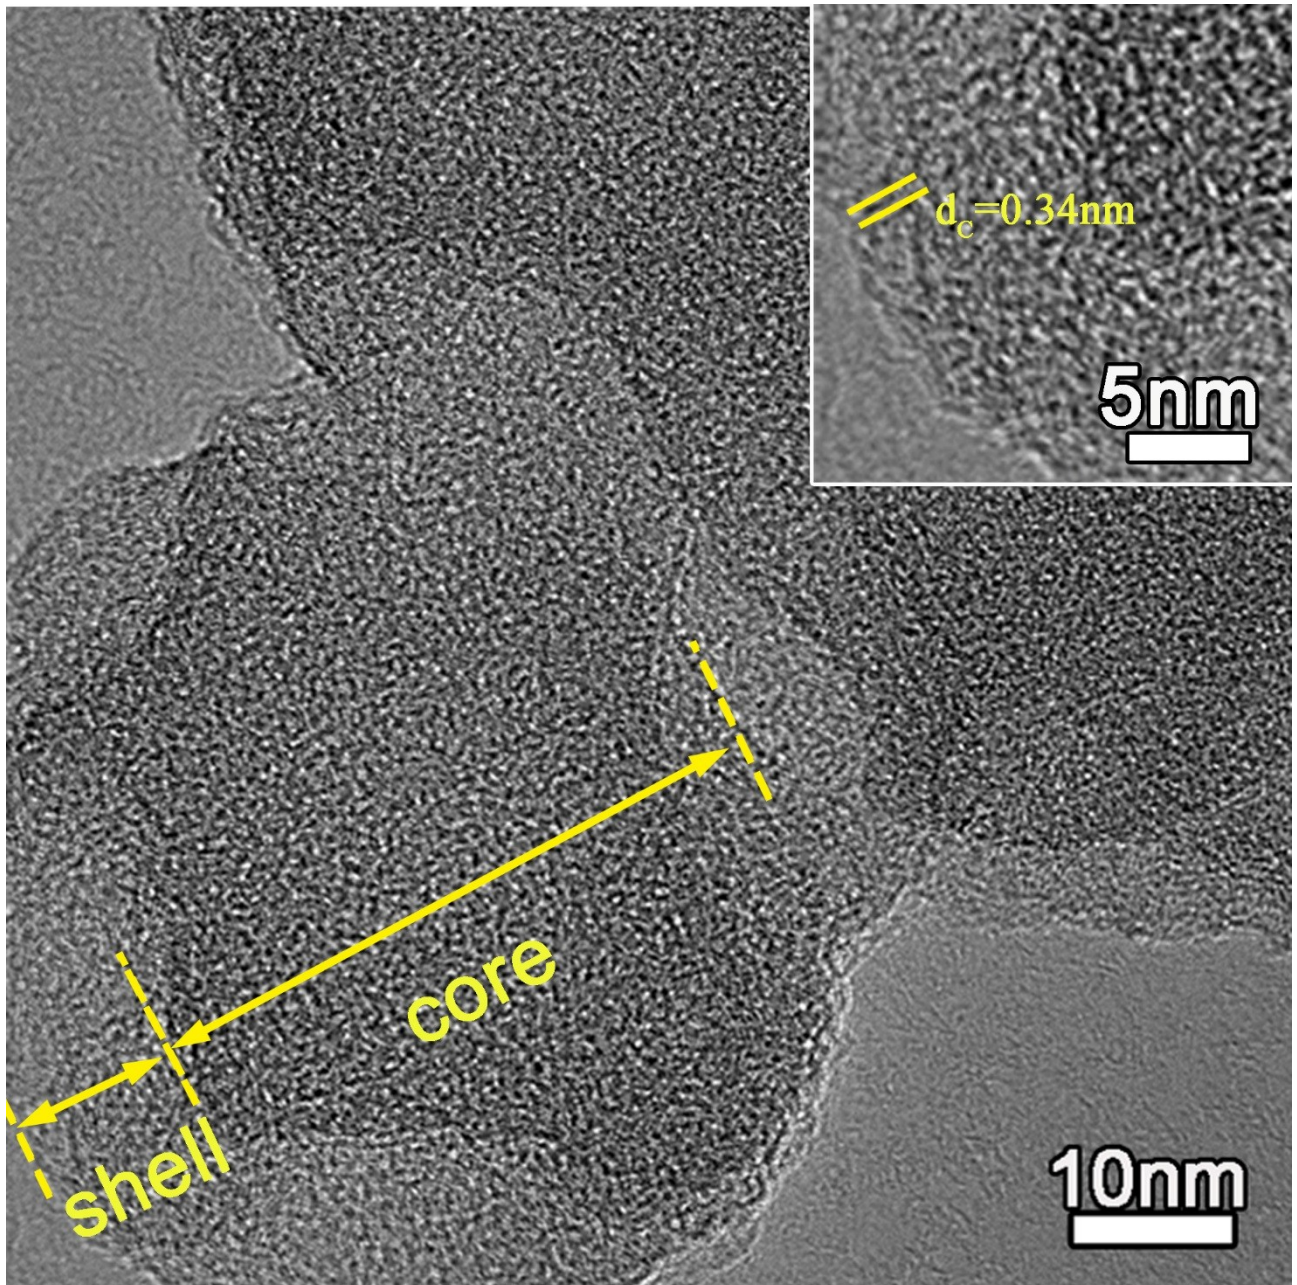

**Fig. S2.** HRTEM image of N-CSHPC-II, clearly showing the graphic layer in the hierarchical core-shell porous structure.

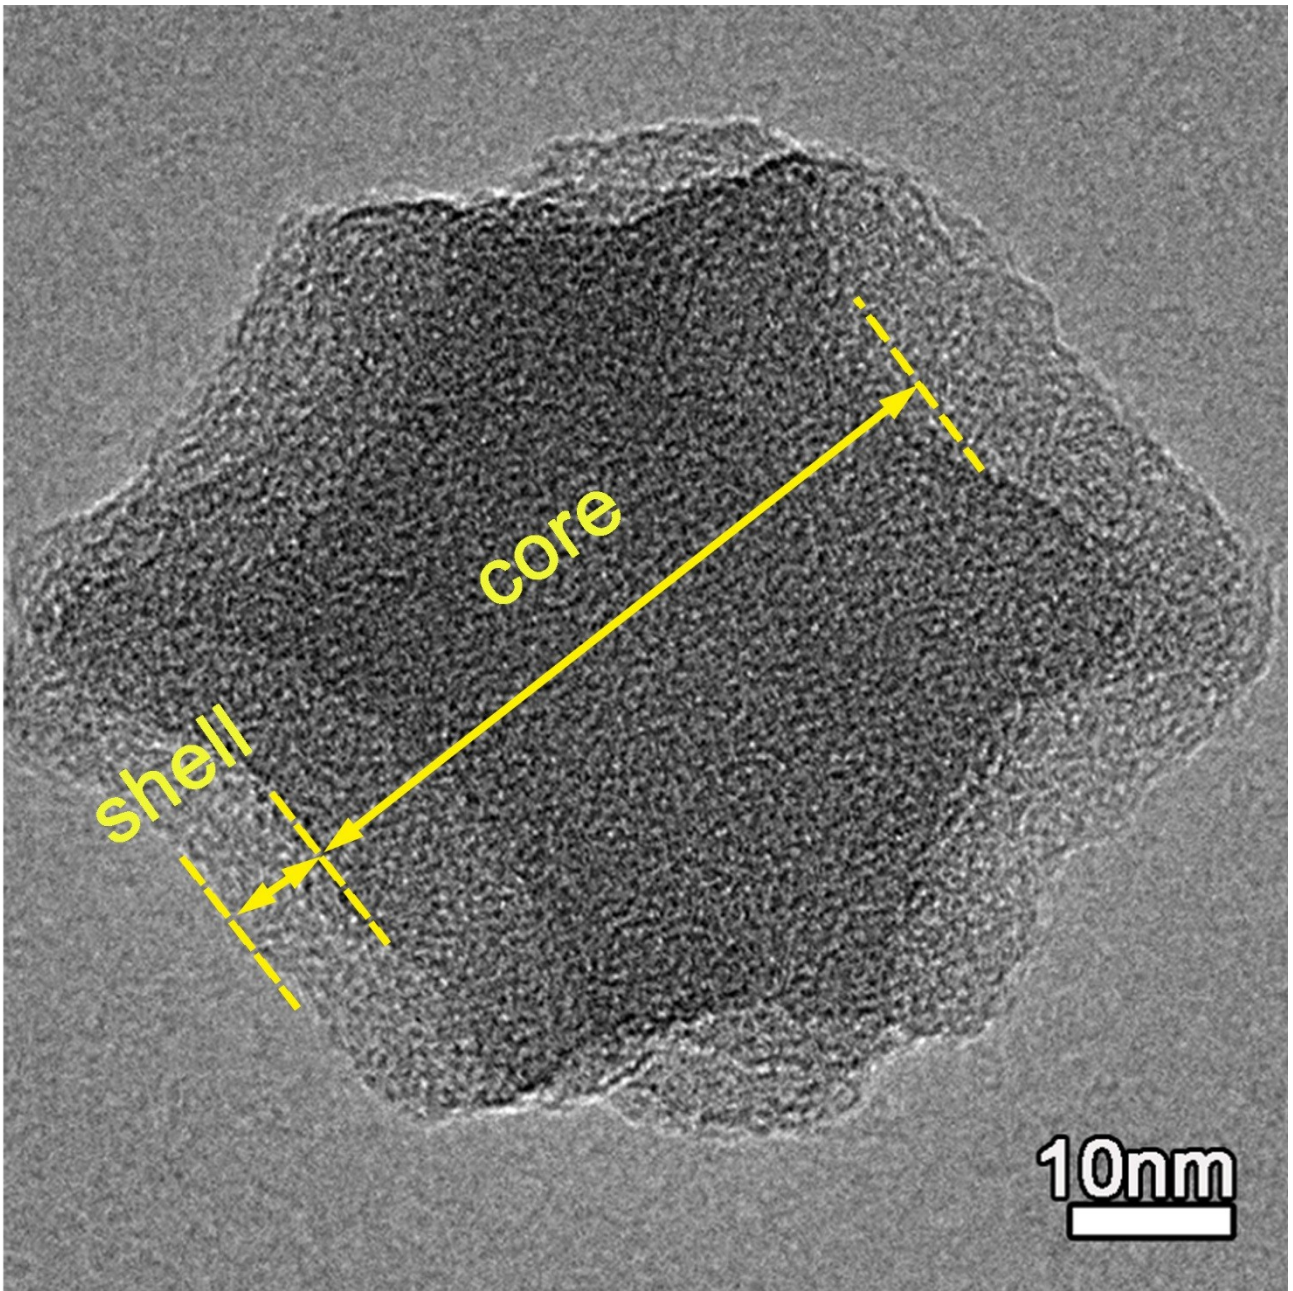

**Fig. S3.** HRTEM image of Se/N-CSHPC-II, showing that most of the pores inside the core cannot be observed.

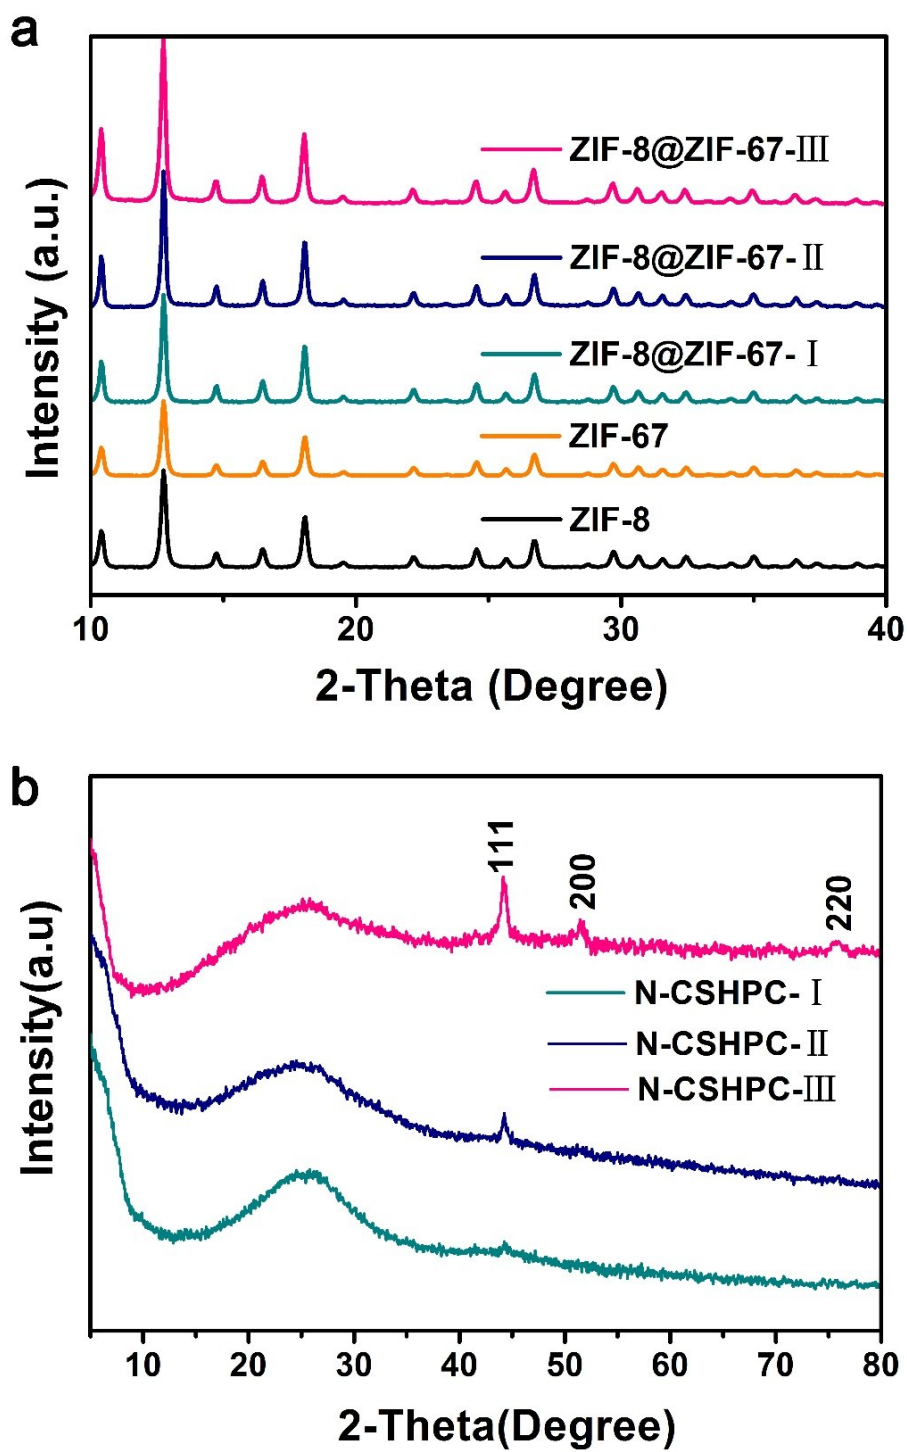

**Fig. S4.** XRD patterns of (a) ZIF-8, ZIF-67, ZIF-8@ZIF-67-I , ZIF-8@ZIF-67-II and ZIF-8@ZIF-67-III , and (b) N-CSHPC.

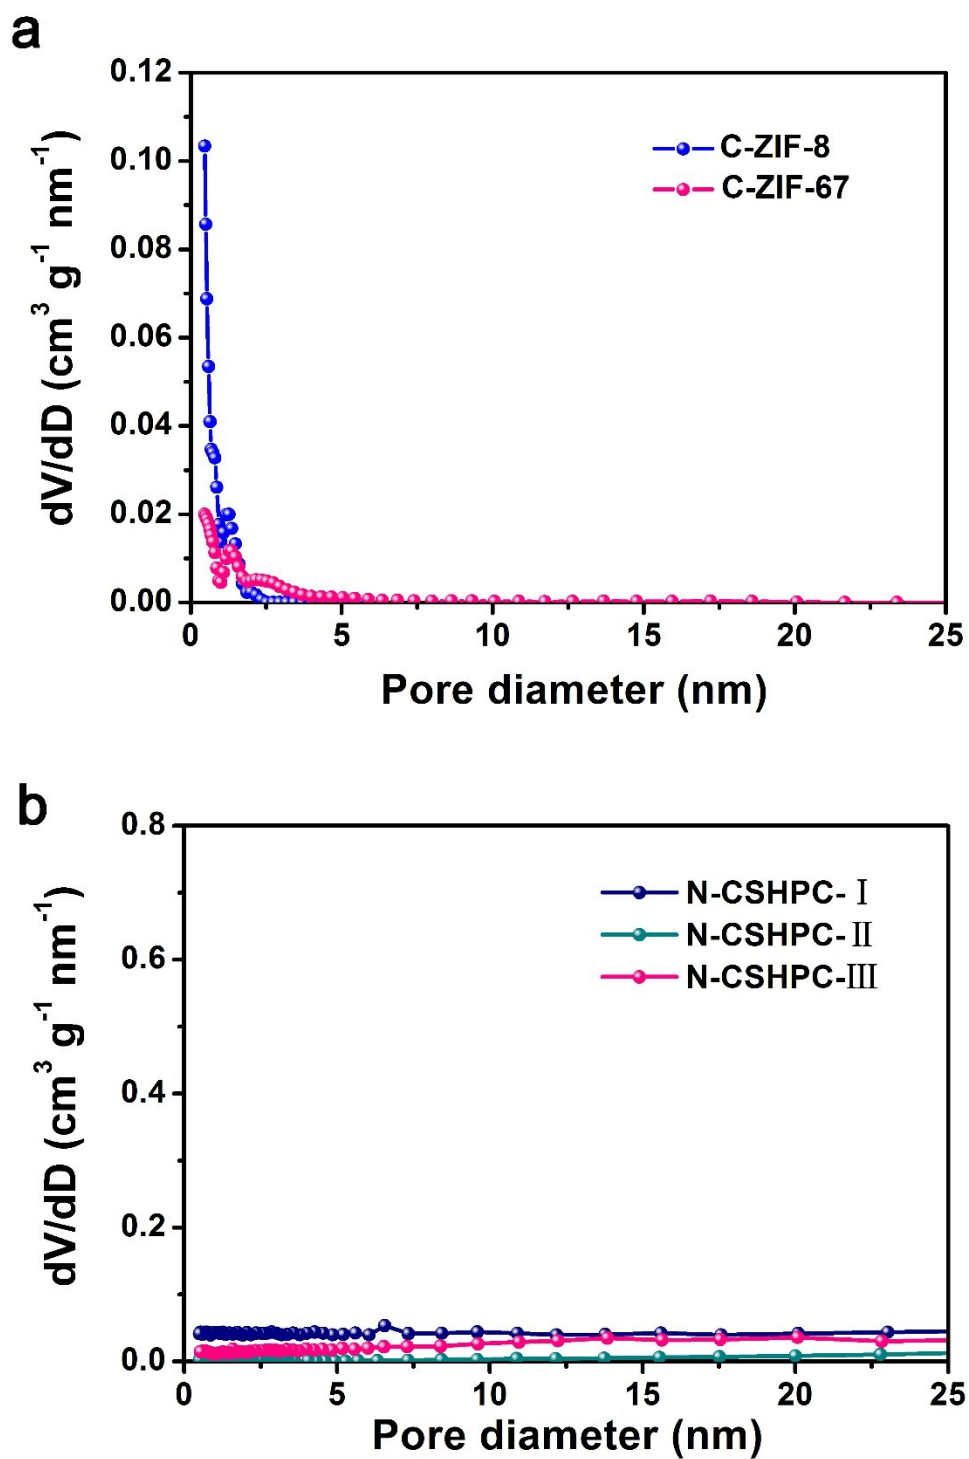

**Fig. S5.** (a) Pore size distribution of C-ZIF-8 and C-ZIF-67 and (b) Pore volume distribution of Se/N-CSHPC.

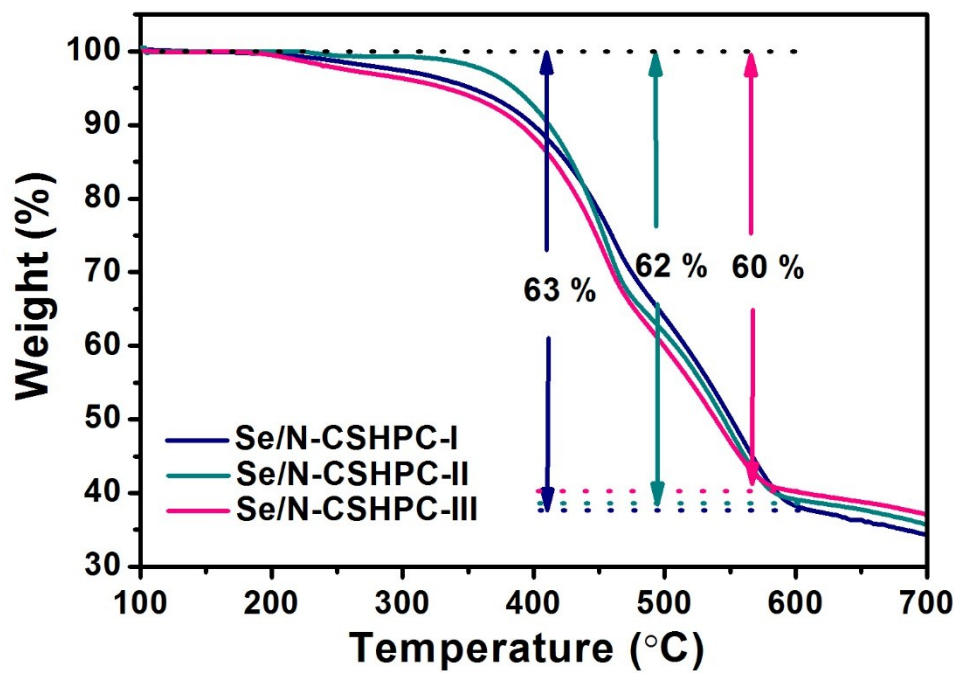

Fig. S6. TG curve of Se/N-CSHPC.

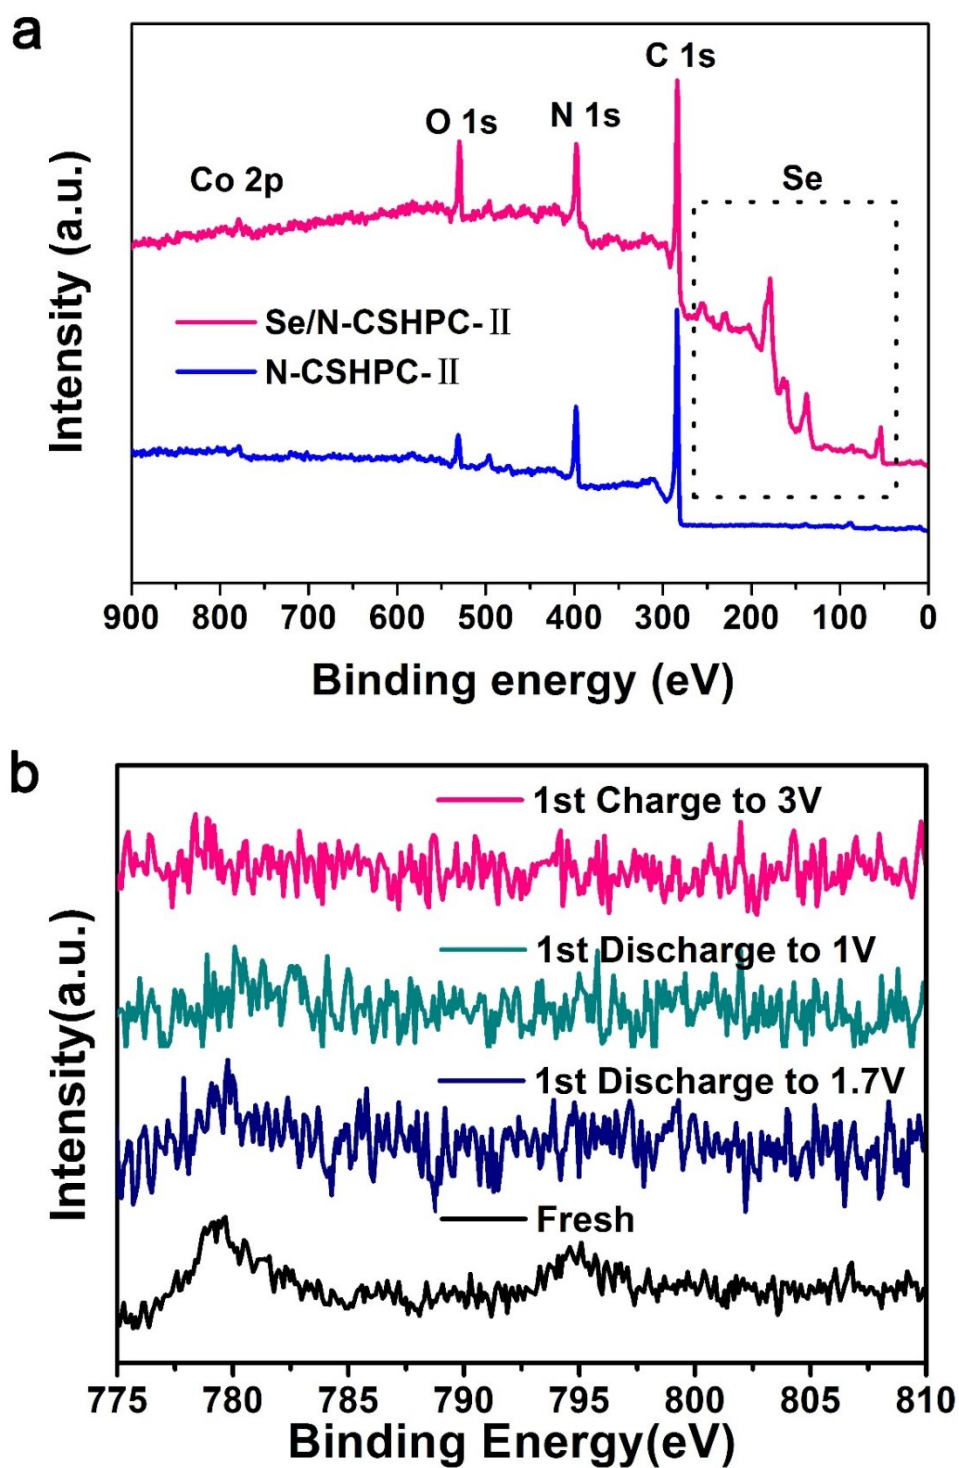

**Fig. S7.** (a) XPS survey scan of N-CSHPC-II and Se/N-CSHPC-II, (b) XPS survey scan of fresh electrode material, 1<sup>st</sup> discharge to 1.7V, 1V, and 1<sup>st</sup> charge to 3V.



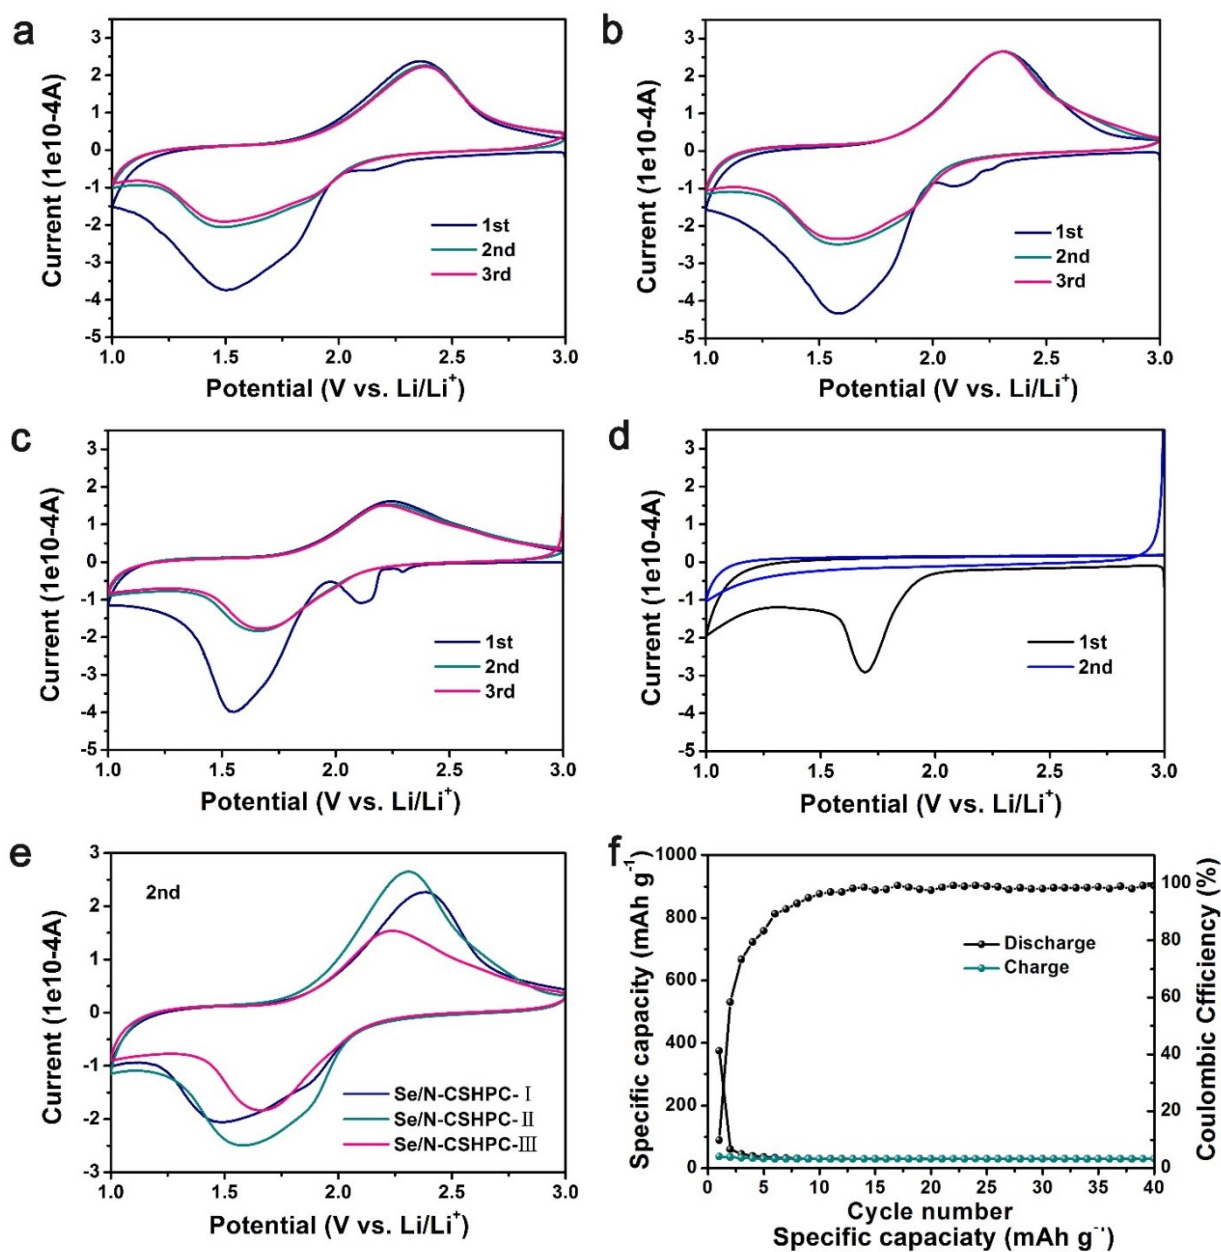

**Fig. S8.** (a) CV curves of Se/N-CSHPC-I, (b) Se/N-CSHPC-II, and (c) Se/N-CSHPC-III at a sweep rate of 0.2 mV s<sup>-1</sup>. (d) CV curves of N-CSHPC-II. (e) 2nd CV curves of Se/N-CSHPC. (f) Typical voltage profiles of N-CSHPC-II.

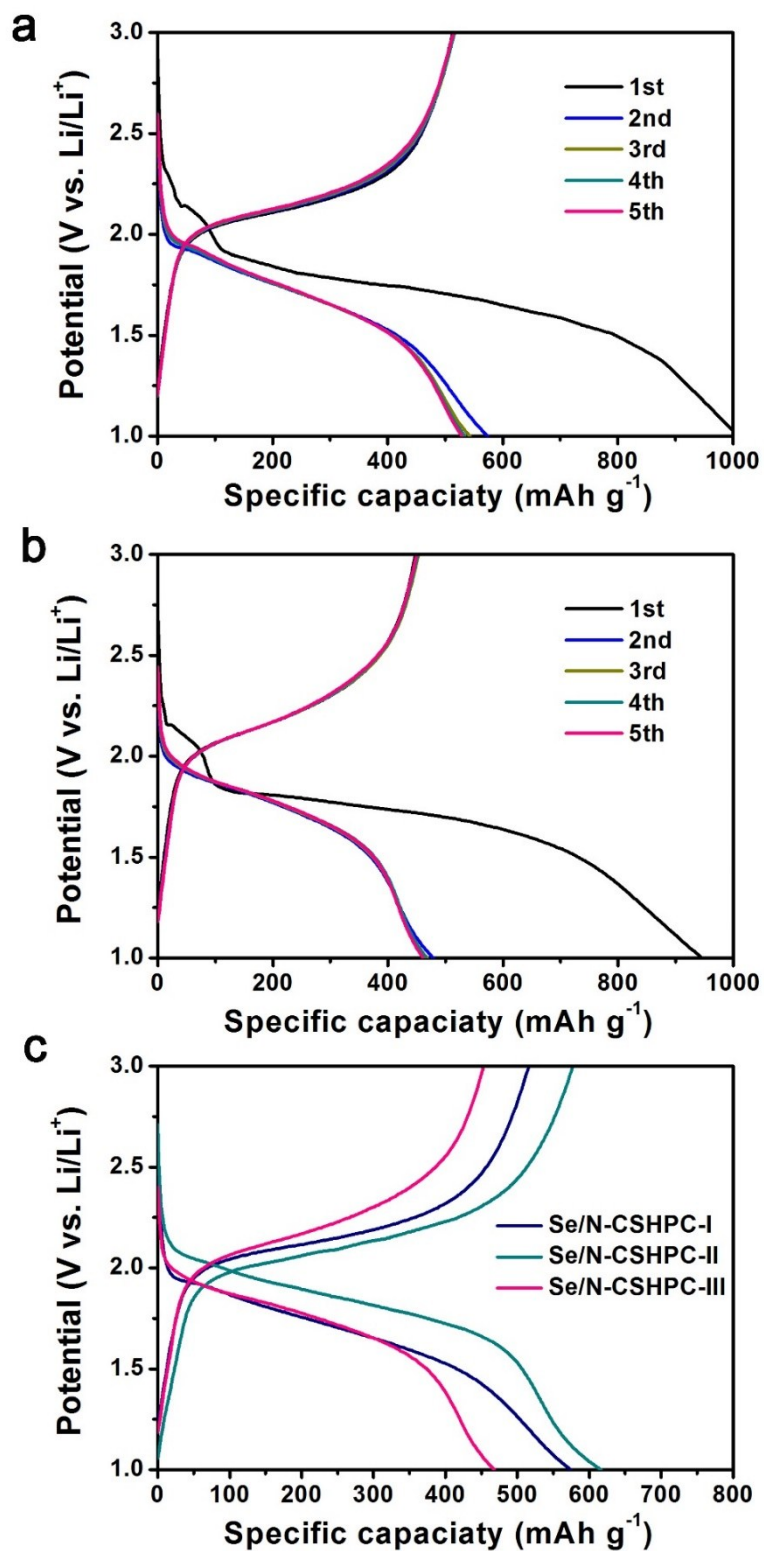

**Fig. S9.** (a) Typical voltage profiles of Se/N-CSHPC-I and (b) Se/N-CSHPC-III for the first five cycles. (c) 2<sup>nd</sup> typical voltage profiles of Se/N-CSHPC.

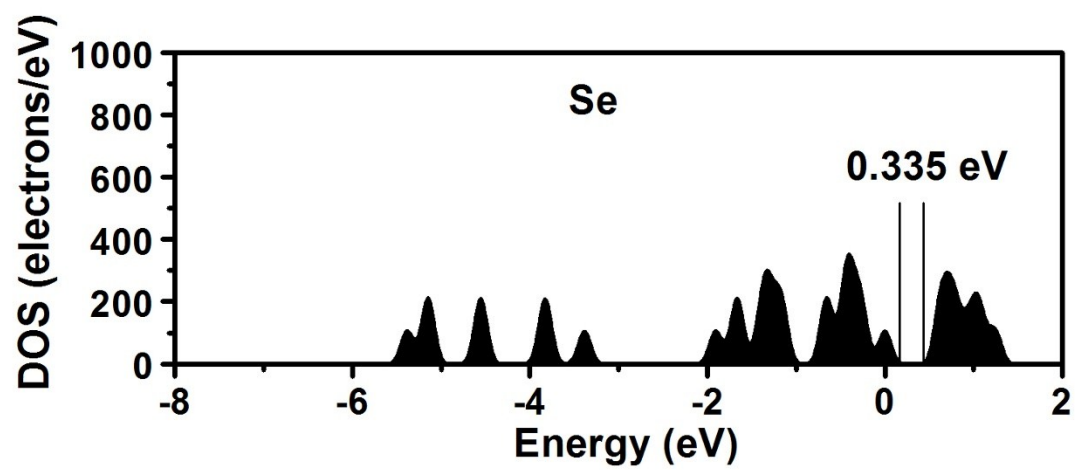

Figure S10. DOS spectrum of Se.

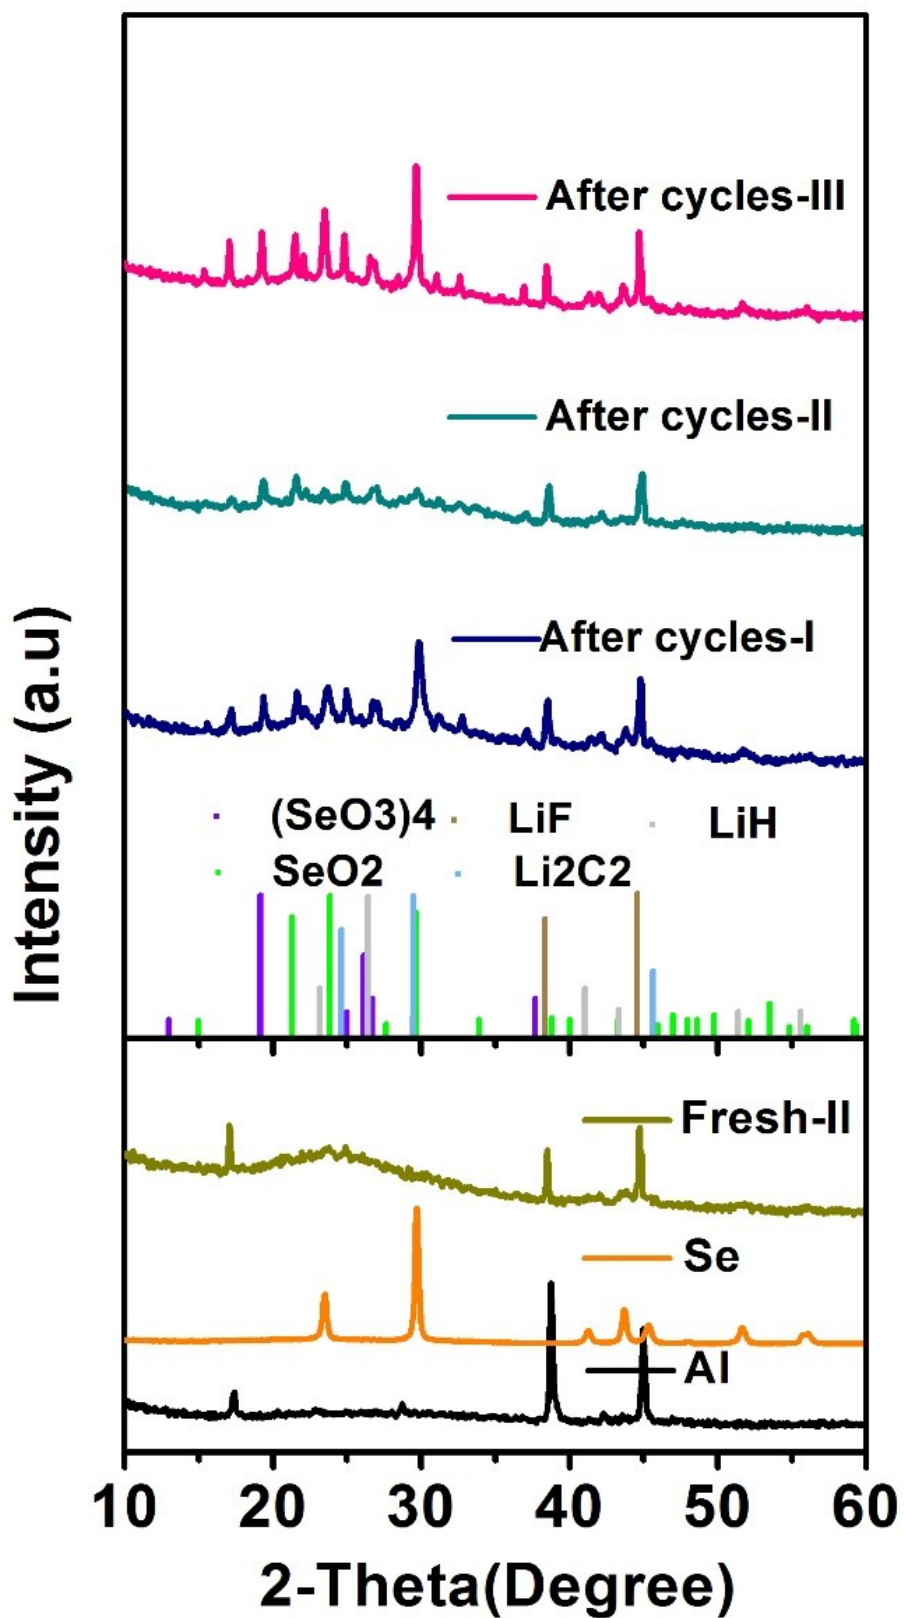

Figure S11. XRD patterns of Se/N-CSHPC before and after 200 cycles.

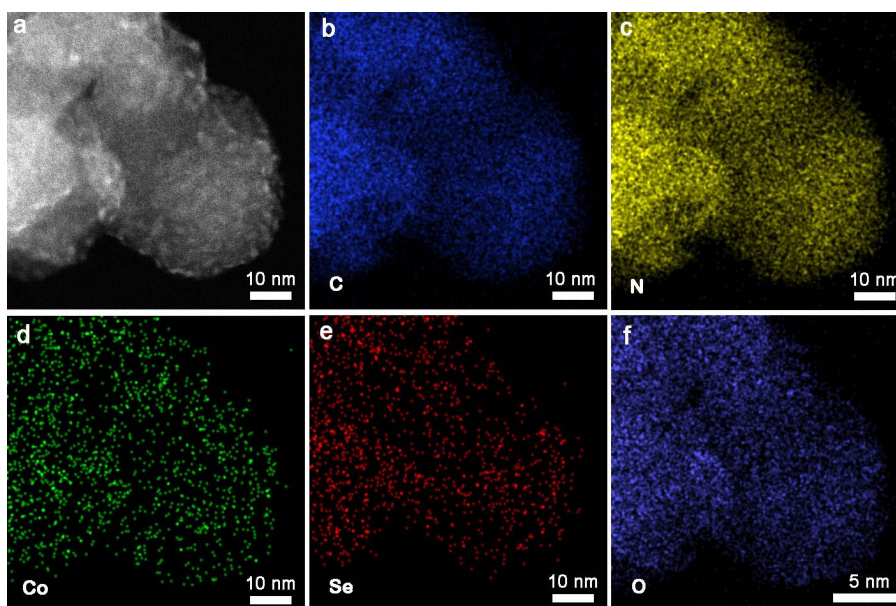

**Fig. S12.** (a) A typical HAADF-STEM image and (b-e) the corresponding EDX elemental mappings of Se/N-CSHPC-II after 200 cycles at 1C.

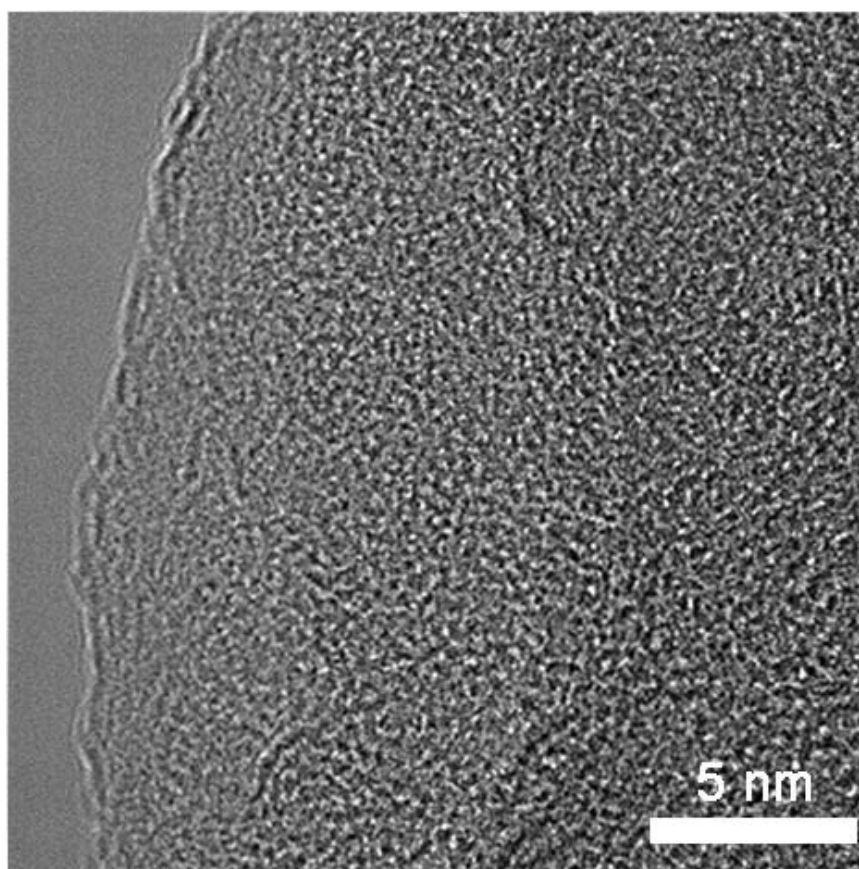

**Fig. S13.** A typical HRTEM image of Se/N-CSHPC-II after 200 cycles at 1C.

**Table S1.** The Energy efficiency of Se/N-CSHPC at 1<sup>st</sup>, 100<sup>th</sup> and 200<sup>th</sup> cycle.

| Items                                    | Se/N-CSHPC-I | Se/N-CSHPC-II | Se/N-CSHPC-III |
|------------------------------------------|--------------|---------------|----------------|
| 1 <sup>st</sup> Charging energy (mWh)    | 0.718        | 0.781         | 0.608          |
| 1 <sup>st</sup> Discharge energy (mWh)   | 1.035        | 1.117         | 0.905          |
| 1 <sup>st</sup> Energy efficiency (%)    | 144.2        | 143.0         | 148.8          |
| 100 <sup>th</sup> Charging energy (mWh)  | 0.635        | 0.692         | 0.587          |
| 100 <sup>th</sup> Discharge energy (mWh) | 0.546        | 0.598         | 0.501          |
| 100 <sup>th</sup> Energy efficiency (%)  | 86.0         | 86.4          | 85.3           |
| 200 <sup>th</sup> Charging energy (mWh)  | 0.617        | 0.666         | 0.549          |
| 200 <sup>th</sup> Discharge energy (mWh) | 0.521        | 0.574         | 0.462          |
| 200 <sup>th</sup> Energy efficiency (%)  | 84.4         | 86.2          | 84.1           |
